# Supplementary material for: Self assembly of silver(i) coordination polymers formed through hydrogen bonding with a new ditopic heteroscorpionate ligand
Source: Royal Society of Chemistry journal article supplement (doi:10.1039/b906047b), 2009-01-01
Supplement: b906047b.pdf [file b906047b.pdf]

## Supplementary Information

Self assembly of silver(I) coordination polymers formed through hydrogen bonding with a new ditopic heteroscorpionate ligand

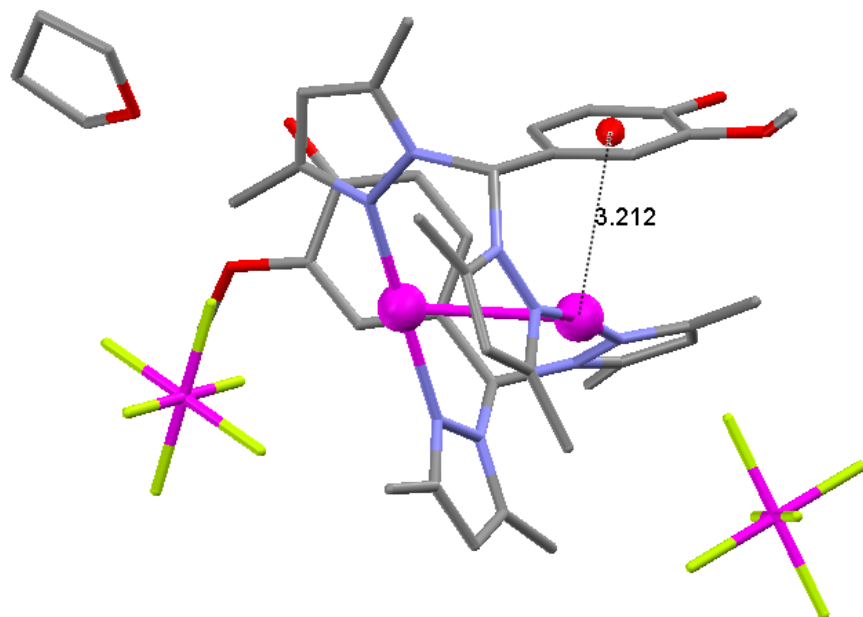

Silver- $\pi$  arene distance interaction 3.2 Å
